# Supplementary material for: Heterogeneous ice nucleation of viscous secondary organic aerosol produced from ozonolysis of α -pinene
Source: Copernicus journal article supplement (doi:10.5194/acp-16-6495-2016), 2016-05-27
Supplement: Supplementary file 1 [file acp-16-6495-2016-supplement.pdf]

Supplement of Atmos. Chem. Phys., 16, 6495–6509, 2016  
<http://www.atmos-chem-phys.net/16/6495/2016/>  
doi:10.5194/acp-16-6495-2016-supplement  
© Author(s) 2016. CC Attribution 3.0 License.

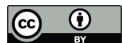

Atmospheric  
Chemistry  
and Physics  
Open Access  
EGU

*Supplement of*

## **Heterogeneous ice nucleation of viscous secondary organic aerosol produced from ozonolysis of $\alpha$ -pinene**

**Karoliina Ignatius et al.**

*Correspondence to:* Karoliina Ignatius (ignatius@tropos.de)

The copyright of individual parts of the supplement might differ from the CC-BY 3.0 licence.

**Table S1.** The viscous  $\alpha$ -pinene SOA ice nucleation onset conditions for frozen fractions of 1 %, 5 % and 10 %. The columns from left to right list the date and the SPIN experiment number, the frozen (activated) fraction  $f_{ice}$ , the ice nucleation onset temperature, the minimum modelled saturation ratio with respect to water in SPIN ( $S_w$  min), the maximum modelled saturation ratio with respect to water in SPIN ( $S_w$  max), the minimum modelled saturation ratio with respect to ice in SPIN ( $S_{ice}$  min), and the maximum modelled saturation ratio with respect to ice in SPIN ( $S_{ice}$  max).

| Date, Exp | $f_{ice}$ (%) | Temperature ( $^{\circ}$ C) | $S_w$ min | $S_w$ max | $S_{ice}$ min | $S_{ice}$ max |
|-----------|---------------|-----------------------------|-----------|-----------|---------------|---------------|
| 25 Oct, 1 | 1             | -38.2                       | 0.87      | 0.95      | 1.26          | 1.38          |
| 25 Oct, 1 | 5             | -38.3                       | 0.88      | 0.97      | 1.27          | 1.40          |
| 25 Oct, 1 | 10            | -38.2                       | 0.89      | 0.98      | 1.29          | 1.42          |
| 26 Oct, 1 | 1             | -39.0                       | 0.85      | 0.91      | 1.24          | 1.33          |
| 26 Oct, 1 | 5             | -39.0                       | 0.85      | 0.91      | 1.24          | 1.33          |
| 26 Oct, 1 | 10            | -39.0                       | 0.85      | 0.92      | 1.24          | 1.34          |
| 26 Oct, 2 | 1             | -38.8                       | 0.85      | 0.92      | 1.24          | 1.34          |
| 26 Oct, 2 | 5             | -38.8                       | 0.86      | 0.93      | 1.25          | 1.35          |
| 26 Oct, 2 | 10            | -38.8                       | 0.86      | 0.93      | 1.26          | 1.36          |
| 26 Oct, 3 | 1             | -37.2                       | 0.86      | 0.91      | 1.23          | 1.31          |
| 26 Oct, 3 | 5             | -37.2                       | 0.86      | 0.92      | 1.23          | 1.32          |
| 26 Oct, 3 | 10            | -37.2                       | 0.86      | 0.92      | 1.23          | 1.32          |
| 27 Oct, 1 | 1             | -38.1                       | 0.86      | 0.93      | 1.24          | 1.35          |
| 27 Oct, 1 | 5             | -38.1                       | 0.86      | 0.94      | 1.25          | 1.36          |
| 27 Oct, 1 | 10            | -38.2                       | 0.86      | 0.94      | 1.25          | 1.37          |
| 28 Oct, 1 | 1             | -39.0                       | 0.84      | 0.90      | 1.23          | 1.31          |
| 28 Oct, 1 | 5             | -38.5                       | 0.85      | 0.95      | 1.23          | 1.39          |
| 28 Oct, 1 | 10            | -38.5                       | 0.86      | 0.95      | 1.24          | 1.38          |
| 28 Oct, 2 | 1             | -38.7                       | 0.87      | 0.95      | 1.26          | 1.38          |
| 28 Oct, 2 | 5             | -38.6                       | 0.88      | 0.95      | 1.27          | 1.38          |
| 28 Oct, 2 | 10            | -38.6                       | 0.88      | 0.95      | 1.28          | 1.38          |
| 29 Oct, 1 | 1             | -38.5                       | 0.89      | 0.98      | 1.29          | 1.42          |
| 29 Oct, 1 | 5             | -38.5                       | 0.89      | 0.98      | 1.29          | 1.42          |
| 29 Oct, 1 | 10            | -                           | -         | -         | -             | -             |

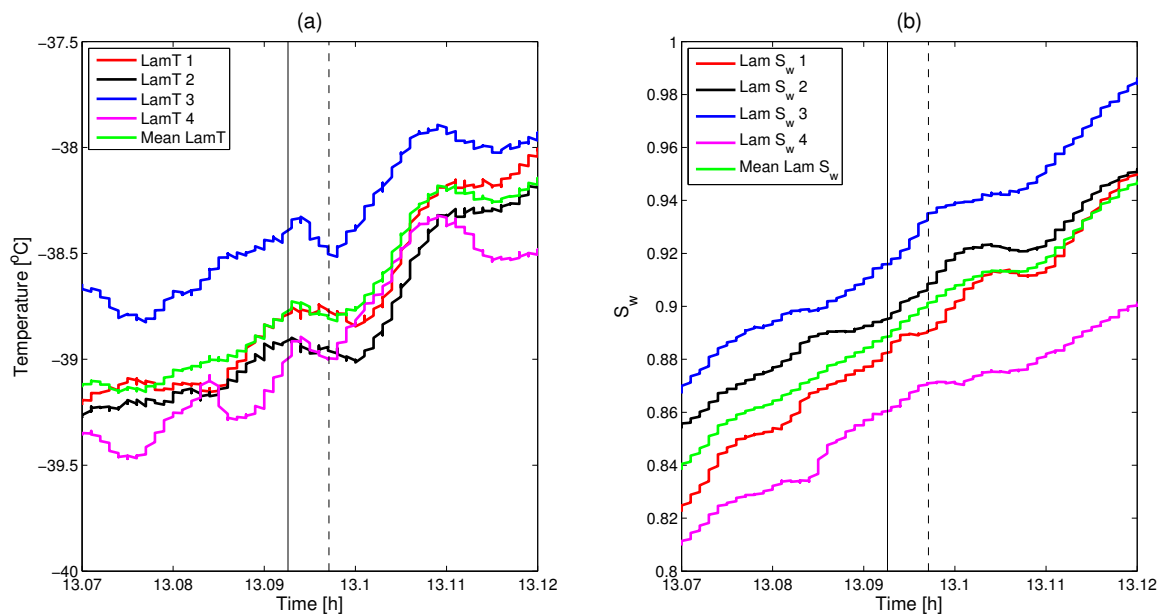

**Figure S1.** Aerosol lamina temperatures and maximum modelled water saturation ratios ( $S_w$ ) during the ice nucleation onset of 550 nm SOA particles depicted in Fig. 3. In panel (a), the aerosol lamina temperatures at 4 locations inside SPIN are plotted. The lamina temperatures are calculated according to the modelling of the buoyancy effect by Rogers (1988), from the temperature readings monitored at 4 thermocouple locations on the SPIN chamber walls. The numbers 1 to 4 denote the different thermocouple locations. The mean lamina temperature is the mean of the 4 depicted lamina temperatures. In panel (b), the calculated lamina saturation ratios with respect to water at the 4 thermocouple locations are shown, as well as their mean. The black solid and dashed vertical lines depict the observed 1 % and 10 % ice activation thresholds, respectively. The maximum modelled  $S_w$  range for each ice nucleation onset is the range between the highest and the lowest lamina  $S_w$ .

## References

Rogers, D. C.: Development of a continuous flow thermal gradient diffusion chamber for ice nucleation studies, *Atmos. Res.*, 22, 149–181, 1988.
